# Supplementary material for: pH-Sensing G Protein-Coupled Receptor OGR1 (GPR68) Expression and Activation Increases in Intestinal Inflammation and Fibrosis
Source: MDPI journal article supplement (doi:10.3390/ijms23031419), 2022-01-26
Supplement: s1 [file s1]

## Supplementary Material

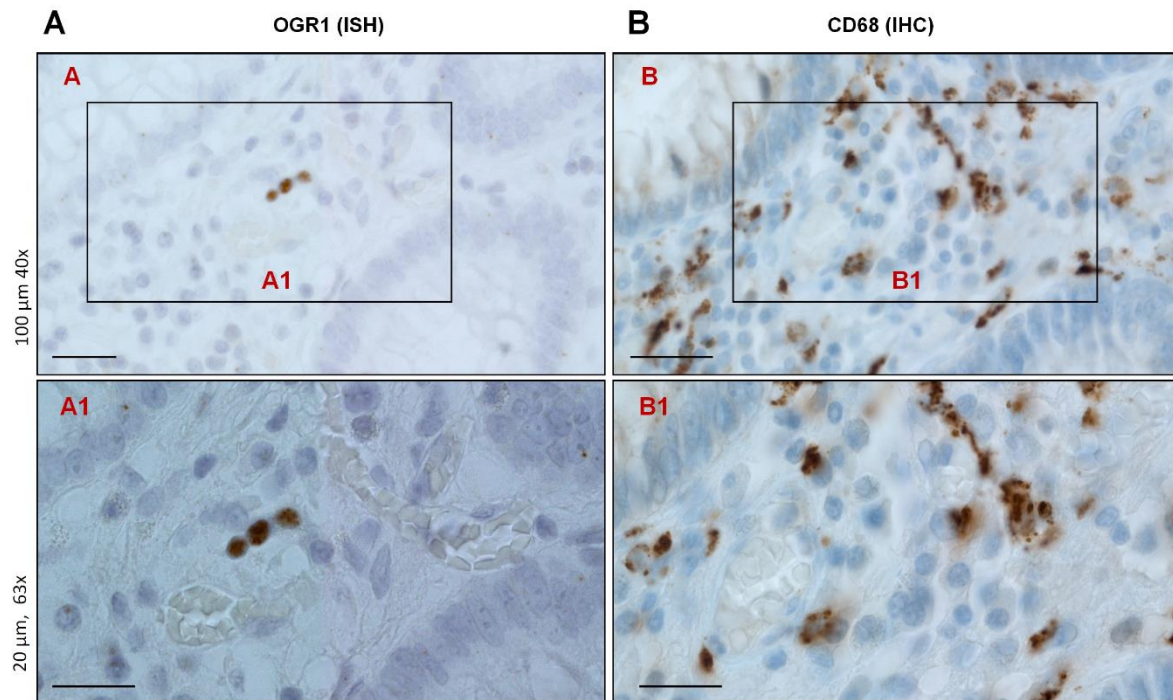

**Suppl. Fig. 1.** *In situ* hybridization (ISH) detection of OGR1 and immunohistochemical (IHC) detection of CD68 in colonic tissue. **A.** ISH staining of OGR1 mRNA (brown dots). **B.** IHC staining (brown colour) with anti-CD68 antibody, counterstaining with haematoxylin. Intestinal samples were taken from 5 non-IBD subjects and paired (non-inflamed and inflamed) samples from 5 CD patients and 5 UC patients. Representative images are shown from a CD patient, non-inflamed tissue. Scale bars: **A–B.** overview images 100 µm; **A1–B1.** detail images, 20 µm. CD: Crohn's disease.

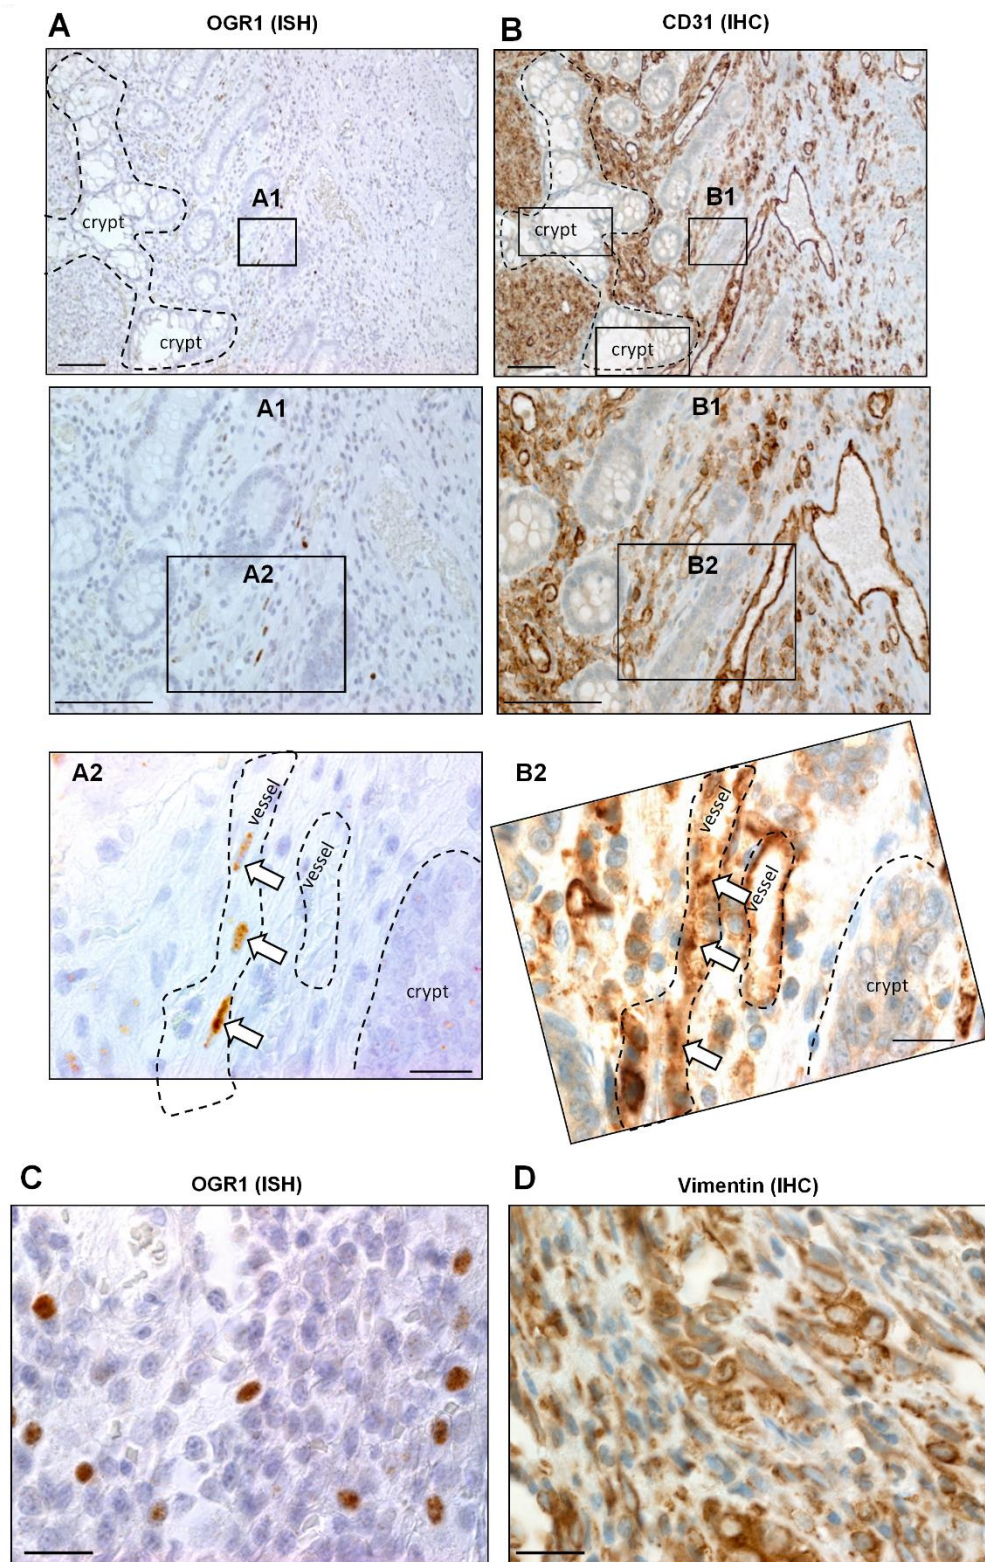

**Suppl. Fig. 2.** In situ hybridization (ISH) detection of OGR1 and immunohistochemical detection of CD31 and vimentin in colonic tissue. **A.** and **C.** ISH staining of OGR1 mRNA (brown dots). **B.** IHC staining (brown colour) with anti-CD31 antibody, counterstaining with haematoxylin. Scale bars: **A–B.** overview images 500  $\mu$ m. **A1–B1.** images, 100  $\mu$ m. **A2–**



**B2.** detail images, 20  $\mu\text{m}$ . **D.** IHC staining (brown colour) of anti-vimentin antibody, counterstaining with haematoxylin. Scale bars: **C–D.** images, 20  $\mu\text{m}$ . Intestinal samples were taken from 5 non-IBD subjects and paired (non-inflamed and inflamed) samples from 5 CD patients and 5 UC patients. Representative images are shown from a CD patient, non-inflamed tissue. IBD: inflammatory bowel disease.

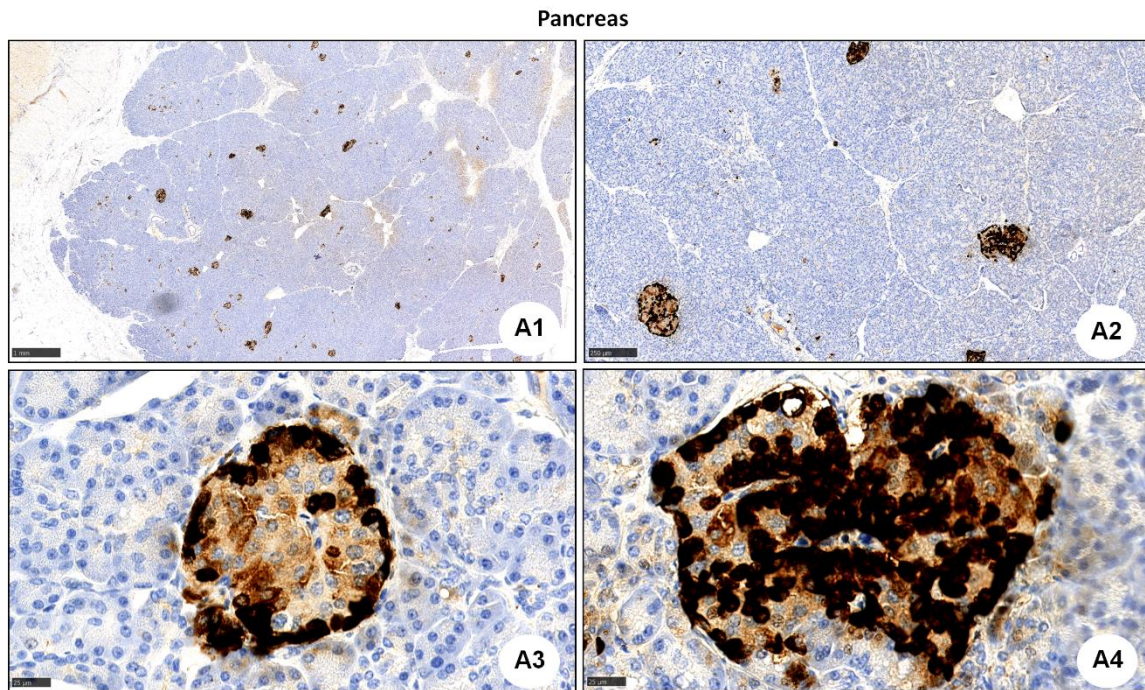

**Suppl. Fig. 3.** Immunohistochemical detection of OGR1. Localisation of OGR1 in healthy human pancreas, OGR1 strongly positive cells are confined to distinct focal points. Scale bars: **A1.** 1 mm; **A2.** 250  $\mu\text{m}$ ; detail images, **A3.** and **A4.** 25  $\mu\text{m}$ .



**A****Mucosal duodenum CD 68 IHC**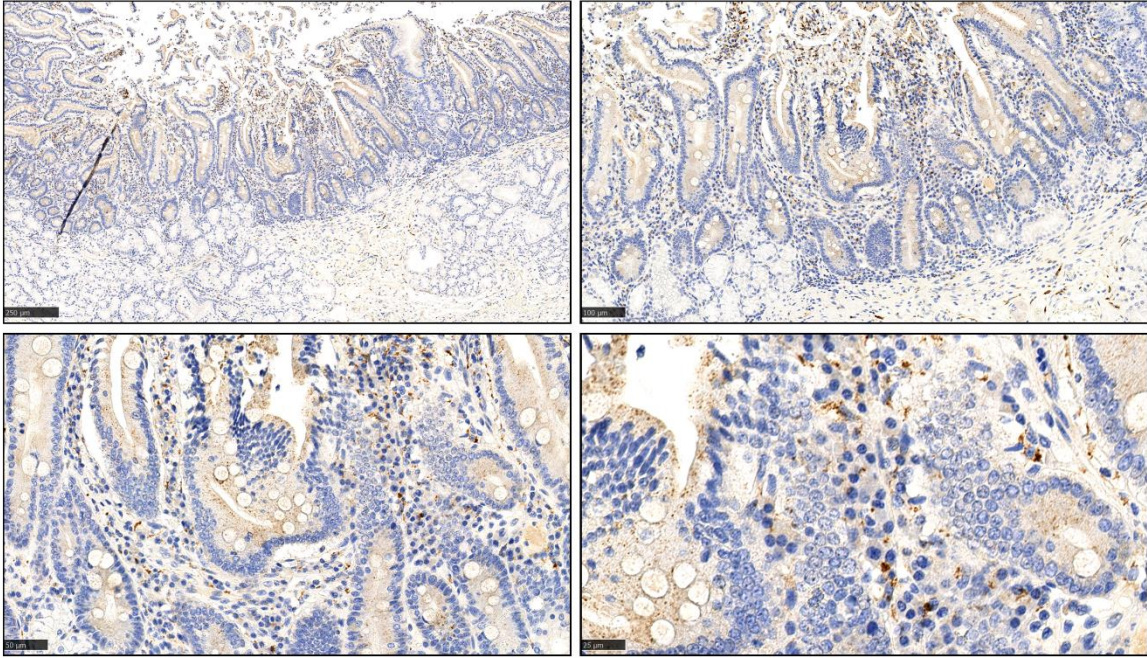**B****Mucosal duodenum CD31 IHC**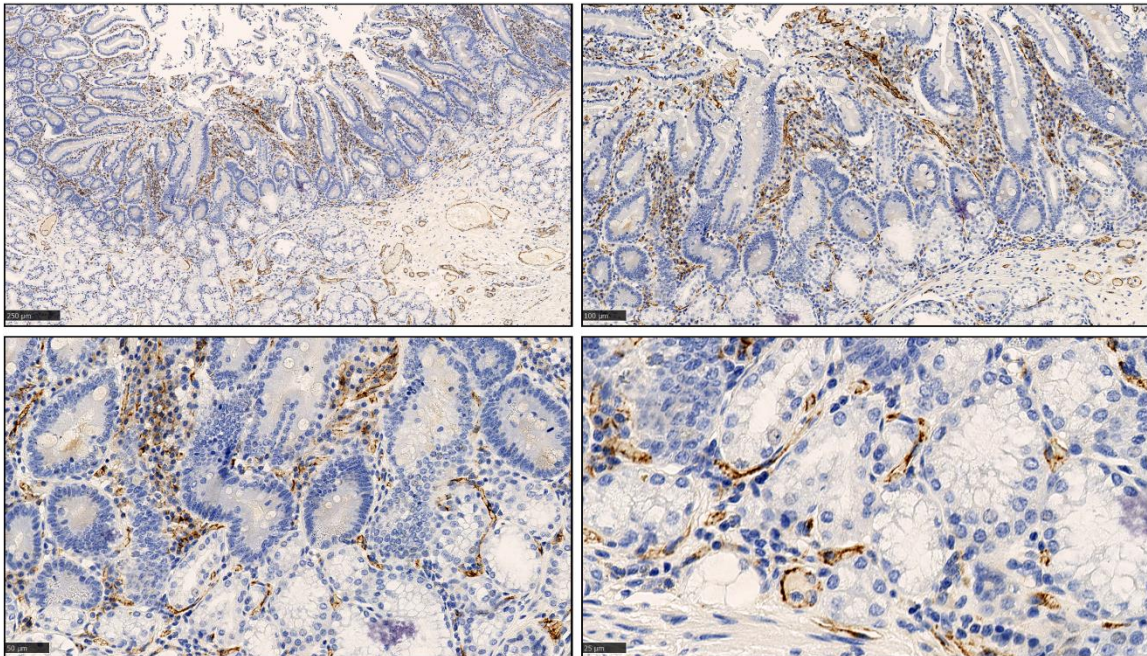

**Suppl. Fig. 4.** Immunohistochemical detection of CD68 and CD31 in healthy human mucosal duodenum. **A.** IHC staining (brown colour) with anti-CD68 antibody, counterstaining with haematoxylin. **B.** IHC staining (brown colour) with anti-CD31 antibody, counterstaining with haematoxylin. Scale bars: as indicated on images.



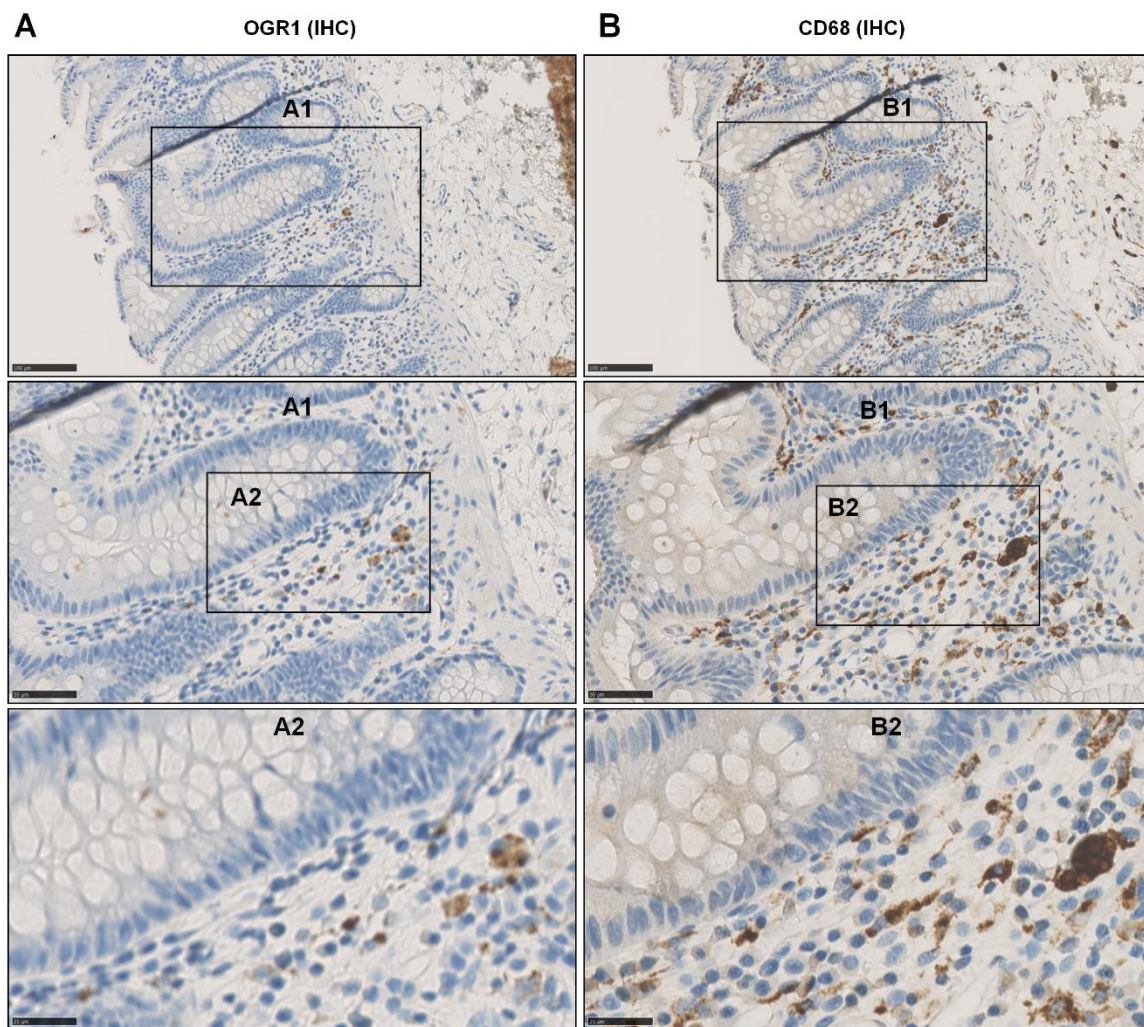

**Suppl. Fig. 5.** Immunohistochemical (IHC) detection of OGR1 and CD68 in colonic tissue. **A.** IHC staining (brown colour) with anti-OGR1 antibody, counterstaining with haematoxylin. **B.** IHC staining (brown colour) with anti-CD68 antibody, counterstaining with haematoxylin. Scale bars: as indicated on images. Intestinal samples were taken from 5 non-IBD subjects and paired (non-inflamed and inflamed) samples from 5 CD patients and 5 UC patients. Representative images are shown from a UC patient, non-inflamed tissue.

Suppl. Fig. 6

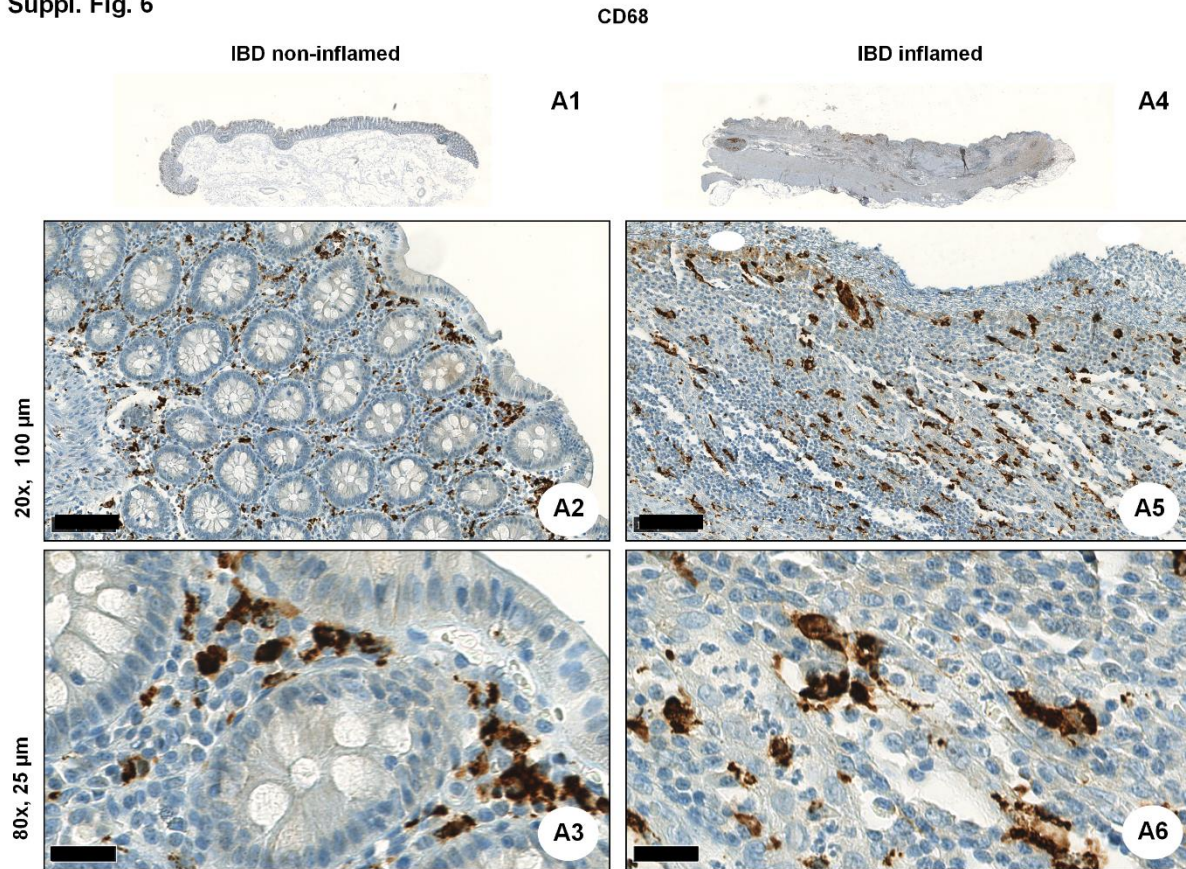

**Suppl. Fig. 6.** Immunohistochemical detection of CD68 and CD31 in non-inflamed and inflamed intestinal tissue. A. IHC staining (brown colour) with anti-CD68 antibody, counterstaining with haematoxylin. **A1–A3.** Non-inflamed, **A4–A6.** Inflamed. Intestinal samples were taken from 5 non-IBD subjects and paired (non-inflamed and inflamed) samples from 5 CD patients and 5 UC patients. Representative images shown are from a CD patient. Scale bars: **A2.** and **A5.** 100  $\mu$ m; **A3.** and **A6.** 25  $\mu$ m.

Suppl. Fig. 7

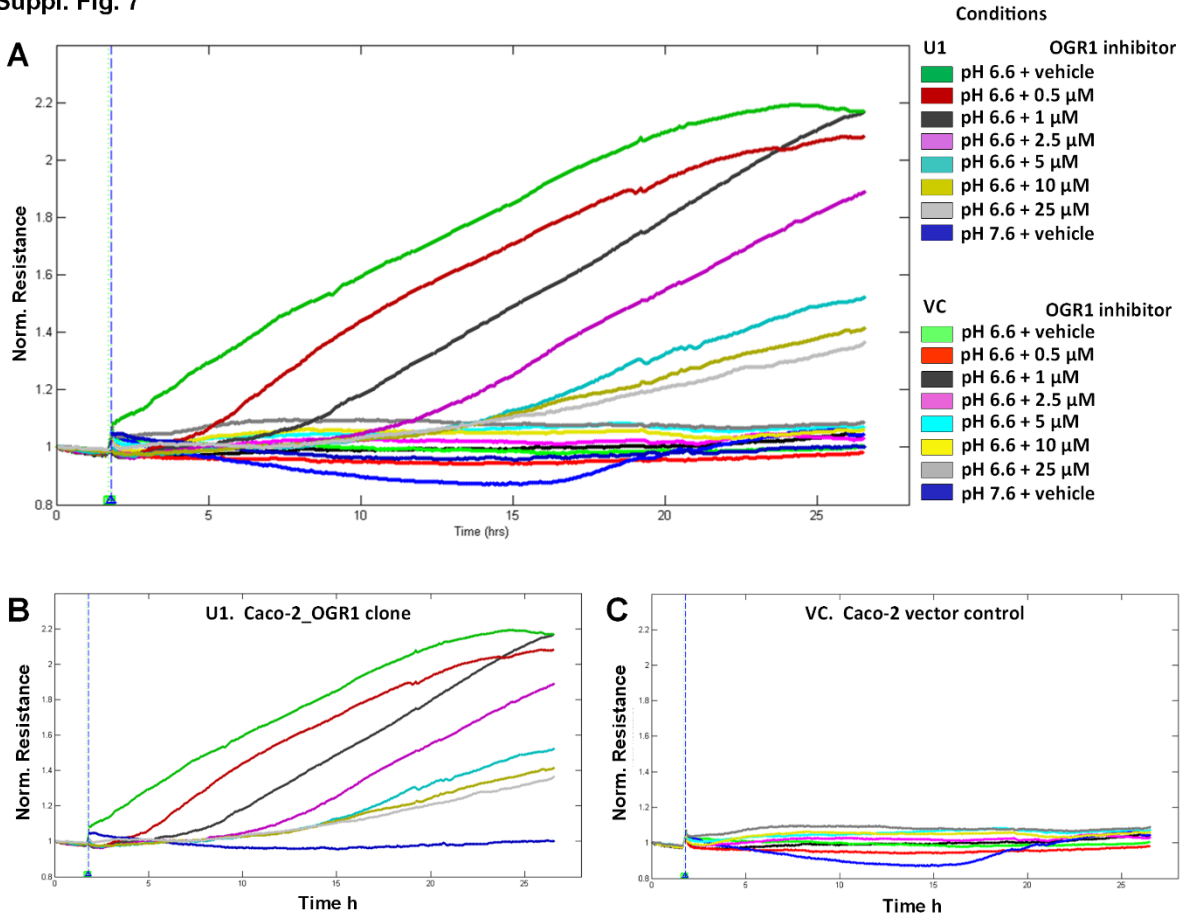

**Suppl. Fig. 7.** Efficacy of the OGR1 inhibitor was measured using electric cell-substrate impedance-sensing (ECIS) technology. Stably overexpressing OGR1 Caco-2 clone, (clone U1); negative control, Caco-2 vector control (VC) cells, grown to confluent monolayers, were subjected to an acidic pH shift with or without the OGR1 inhibitor (0.5, 1.0, 2.5, 5, 10, 25  $\mu$ M). Changes in resistance of cell monolayers were monitored in real time. **A** Representative graph of 8 independent experiments is shown. **B**. Representative graph of one experiment with clone U1. **C**. Representative graph of one experiment with Caco-2 VC. OGR1: ovarian cancer G-protein-coupled receptor 1.
